# Supplementary material
Source: Research Square preprint supplement (doi:10.21203/rs.3.rs-9879971/v1)
Supplement: Supplementary file 3 [file ed740c830ac62875b93b5284.docx]

| **Patients (no.) sampling** | 54 |
| --- | --- |
| Samples pre-NAC CR (TURBT) (no. (%)) | 15/49 (31%) |
| Samples pre-NAC IR (TURBT) (no. (%)) | 34/49 (69%) |
| Samples post-NAC IR (Cystectomy) (no. (%)) | 37/54 (68.5%) |
| Samples positive LN mets (Cystectomy) (no. (%)) | 22/54 (41%) |
| **Median age (range)** | 63 (35-78y) |
| **Gender** |  |
| Male (no. (%)) | 40/54 (74%) |
| Female (no. (%)) | 14/54 (26%) |
| **yPT stage (at cystectomy, post-NAC)** |  |
| 0 – no primary residual tumor (no. (%)) | 16/54 (29%) |
| 1 – subepithelial invasion (no. (%)) | 7/54 (13%) |
| 2 – muscle invasion (no. (%)) | 9/54 (17%) |
| 3 – cross-organ invasion (no. (%)) | 13/54 (24%) |
| 4 – extravesical invasion (no. (%)) | 9/54 (17%) |
| **TRG pooled (PT+Mets)** |  |
| 1 – complete (no. (%)) | 15/54 (28%) |
| 2- partial (no. (%)) | 15/54 (28%) |
| 3 – weak/no response (no. (%)) | 24/54 (44%) |
| **Long-term progression/recurrence** |  |
| Yes (no. (%)) | 29/54 (54%) |
| No (no. (%)) | 25/54 (46%) |
| **Vital status** |  |
| Still alive (no. (%)) | 20/54 (37%) |
| Dead from cancer (no. (%)) | 28/54 (52%) |
| Dead from other causes (no. (%)) | 6/54 (11%) |

**Supplementary table 1. Cohort 1. Clinicopathological data. Cohort of bladder cancer patients treated with neoadjuvant chemotherapy followed by cystectomy.**

NAC, neoadjuvant chemotherapy; TURBT, trans urothelial resection of bladder tumors; Mets, metastasis; TRG, tumor regression grade.

**Supplementary table 2. Cohort 2.** **Clinicopathological data. Cohort of high grade urothelium carcinoma patients who experience metachronous recurrences in both bladder and upper track locations.**

| **Patients (no.) sampling** | 38 |
| --- | --- |
| Primary BlCa (no. (%)) | 22/38 (58%) |
| Primary UTUC (no. (%)) | 16/38 (42%) |
| **Median age (range)** | 66 (35-88y) |
| **Gender** |  |
| Male (no. (%)) | 23/38 (61%) |
| Female (no. (%)) | 15/38 (39%) |
| **Long-term progression/recurrence** |  |
| Yes (no. (%)) | 9/38 (24%) |
| No (no. (%)) | 29/28 (76%) |
| **Vital status** |  |
| Still alive (no. (%)) | 25/38 (66%) |
| Dead from cancer (no. (%)) | 3/38 (8%) |
| Dead from other causes or not defined (no. (%)) | 10/38 (26%) |

BlCa, bladder cancer; UTUC, upper-track urothelial carcinoma.
