# Supplementary material
Source: Research Square preprint supplement (doi:10.21203/rs.3.rs-9879971/v1)
Supplement: Supplementary file 4 [file ee5768968f3b055314ff6952.docx]

**Supplementary figure legends**

***Sup. Fig. 1. Pathway activity analysis. A)*** Bubble plots representing gene transcription across spatial identified clusters (#0-11). Dot size indicates the percentage of cells expressing each gene in each cluster, and dot color represents the average expression level (scaled expression, Blue, high; dark yellow, low). **B)** Pathway activity scores analysis. Pathway activity for each spatial gene expression clusters was estimated against the PROGENy pathway database using the AddModuleScore function of Seurat and the genes that show a positive weight as accessed via the decoupleR package). The cluster legend is detailed to the right of the panel and identified by different colors.

***Sup. Fig. 2. Spatial clustering map of KDM3A and BAX.*** Spatial transcriptomic map of *KDM3A* (A) and *BAX* (B) across all experimental conditions (tissue, untreated, CDDP+GEM and experimental). CDDP+GEM, cisplatin+gemcitabine. (C) Pie charts represent the median percentage of cells (n=9 samples) that are negative or positive for KDM3A (C), respectively. Positive quantification has three levels of intensity (+1, +2 and +3). Images were acquired using the scanner Panoramic 250 Flash II (3DHistech, Hungary). Quantification was performed on QuPath through customized protocols. (D) Immunofluorescence staining quantification of KDM3A in *ex vivo* treated bladder cancer tissue slices (n=9). Percentage positive cells are represented by paired scatter plots, comparing tissue, untreated and CDDP+GEM conditions. * p value <0.05. CDDP+GEM, Cisplatin+Gemcitabine.

***Sup. Fig. 3. GLUT1 as a prognostic marker in bladder cancer.* (A)** % of GLUT1 positive staining cells (intensity 3+) in primary samples pre- and post-NAC and in the respective positive lymph node metastasis. **(B)** % of GLUT1 positive staining cells (intensity 3+) in primary samples pre-NAC comparing samples from patients that did not develop positive lymph node metastasis with samples from patients that develop <5 or >5 positive lymph node metastasis. **C)** Kaplan-Meier curve for disease-specific survival in samples at cystectomy. **D)** Kaplan-Meier curve for progression-free survival in samples at cystectomy. Both survival curves are stratified by GLUT1 (intensity +3) low and high. The cutoff is the median expression value. Hazard ratio Forest plot for the association of tumor area content, tumor regression grade (TRG), GLUT1 expression at cystectomy, time to start chemotherapy, gender and age at diagnosis with the cancer-specific survival **(E)** and progression-free survival **(G)**. Horizontal bars represent 95% confidence intervals; points indicate Hazard ratio estimates. Vertical line at Hazard ratio (HR)=1 represents no association. Kaplan-Meier survival curves stratified by risk group of the multivariable cox regression models for disease-specific survival **(F)** and progression **(H).** The baseline is the lowest risk group, while the others contain the highest risk variables comparing high-risk GLUT1 vs low-low risk GLUT1. * p value <0.05; ** p value <0.01; **** p value <0.0001; ns, non-significative. NAC, neoadjuvant chemotherapy; TRG, tumor regression grade; HR, hazard ratio; LNmets, lymph node metastasis; DFS, disease-free survival; PFS, progression-free survival.

***Sup. Fig. 4. GLUT1 expression in recurrent urothelium carcinoma samples.*** A) Representative images of GLUT1 (ref) and KDM3A (green) immunofluorescence staining in primary and recurrences of urothelium carcinomas (bladder and upper track tumor locations). Scale bar=50µm (20x magnification). Images were acquired using the scanner Panoramic 250 Flash II (3DHistech, Hungary). DAPI was used as a dye for nuclear DNA counterstaining (blue). **B)** % of GLUT1 positive staining cells in primary no recurrent and recurrent upper track urothelium carcinoma and in the respective metachronous bladder cancer metastasis. C) % of GLUT1 positive staining cells in primary no recurrent and recurrent bladder cancer and in the respective metachronous upper track metastasis. BC, bladder cancer; UTUC, upper track urothelial carcinoma; ***, p value <0.001; **** p value < 0.0001; ns, non-significative.

***Sup. Fig. 5. Spatial transcriptomics quality control (QC***). **A)** QC scatterplot for spatial transcriptomics, plotting total counts vs. detected spatial features with density contours. Color gradient indicates spot density. **B)** t-Distributed Stochastic Neighbor Embedding showing the distribution of the transcriptomic data of each experimental condition ((tissue, untreated, CDDP+GEM and experimental). **C)** Silhouette plot evaluating clustering resolution. (optimal at 0.4, dashed line). **D)** Per-sample silhouette distributions across tested resolutions. The light blue rectangle highlights the optimal resolution. CDPP+GEM, Cisplatin+Gemcitabine.
