# Supplementary material
Source: Research Square preprint supplement (doi:10.21203/rs.3.rs-9879971/v1)

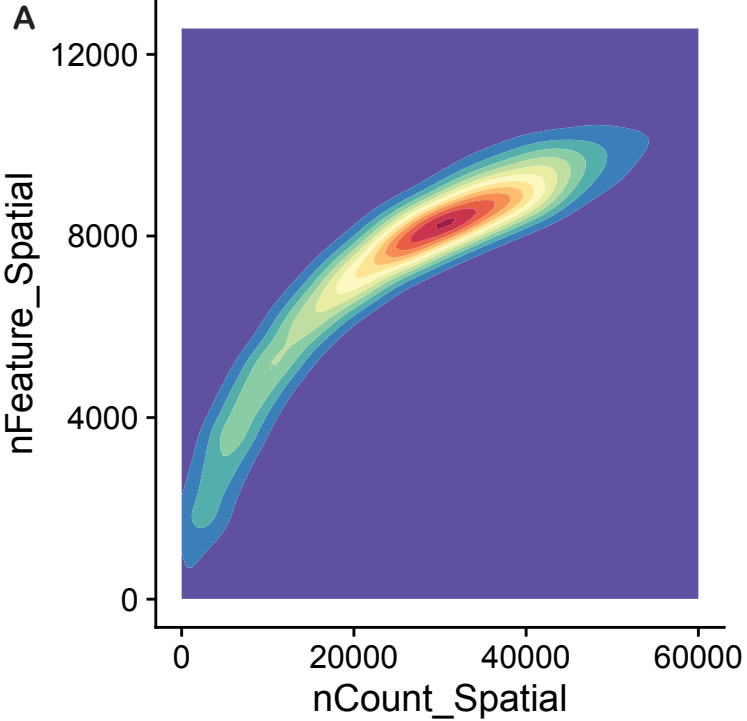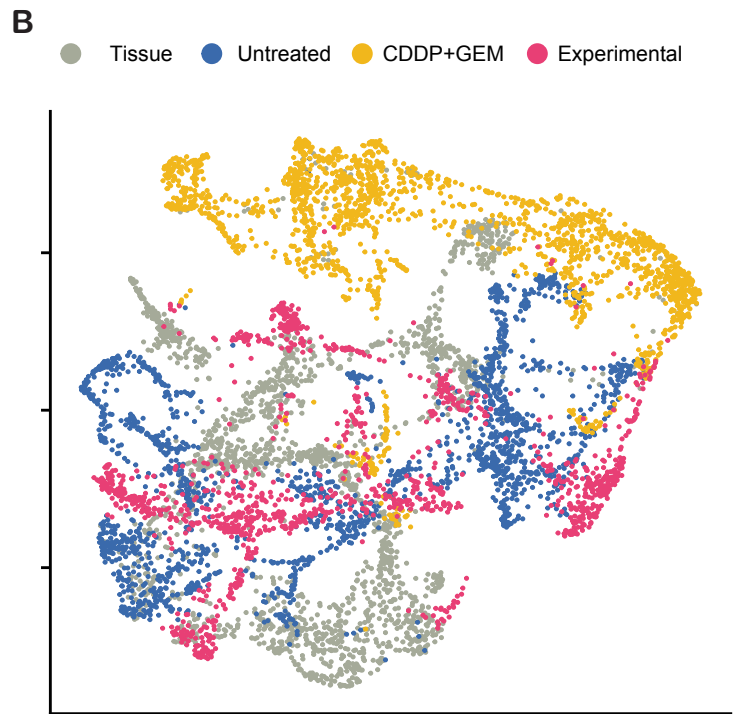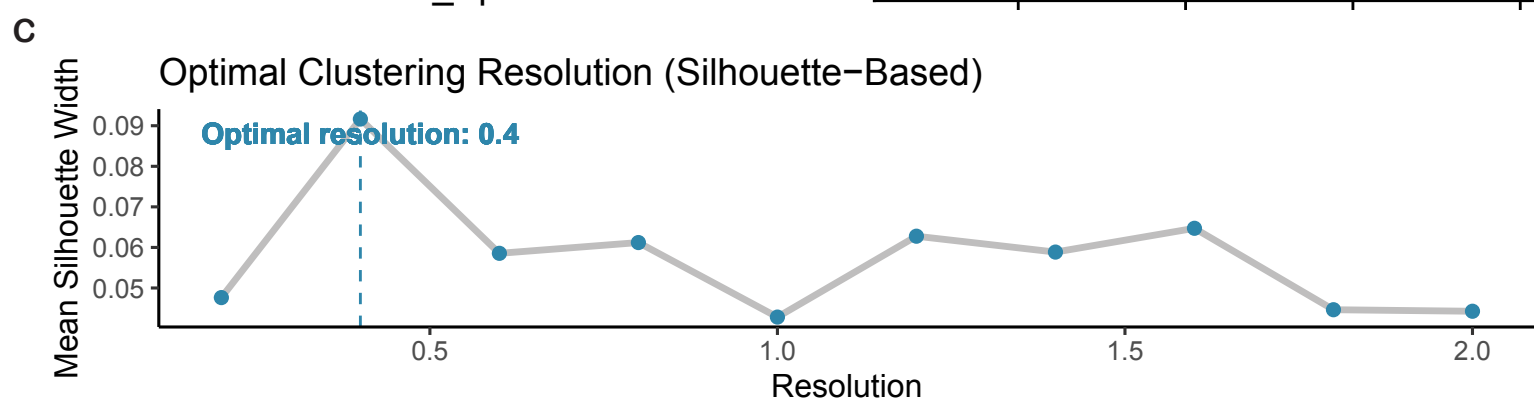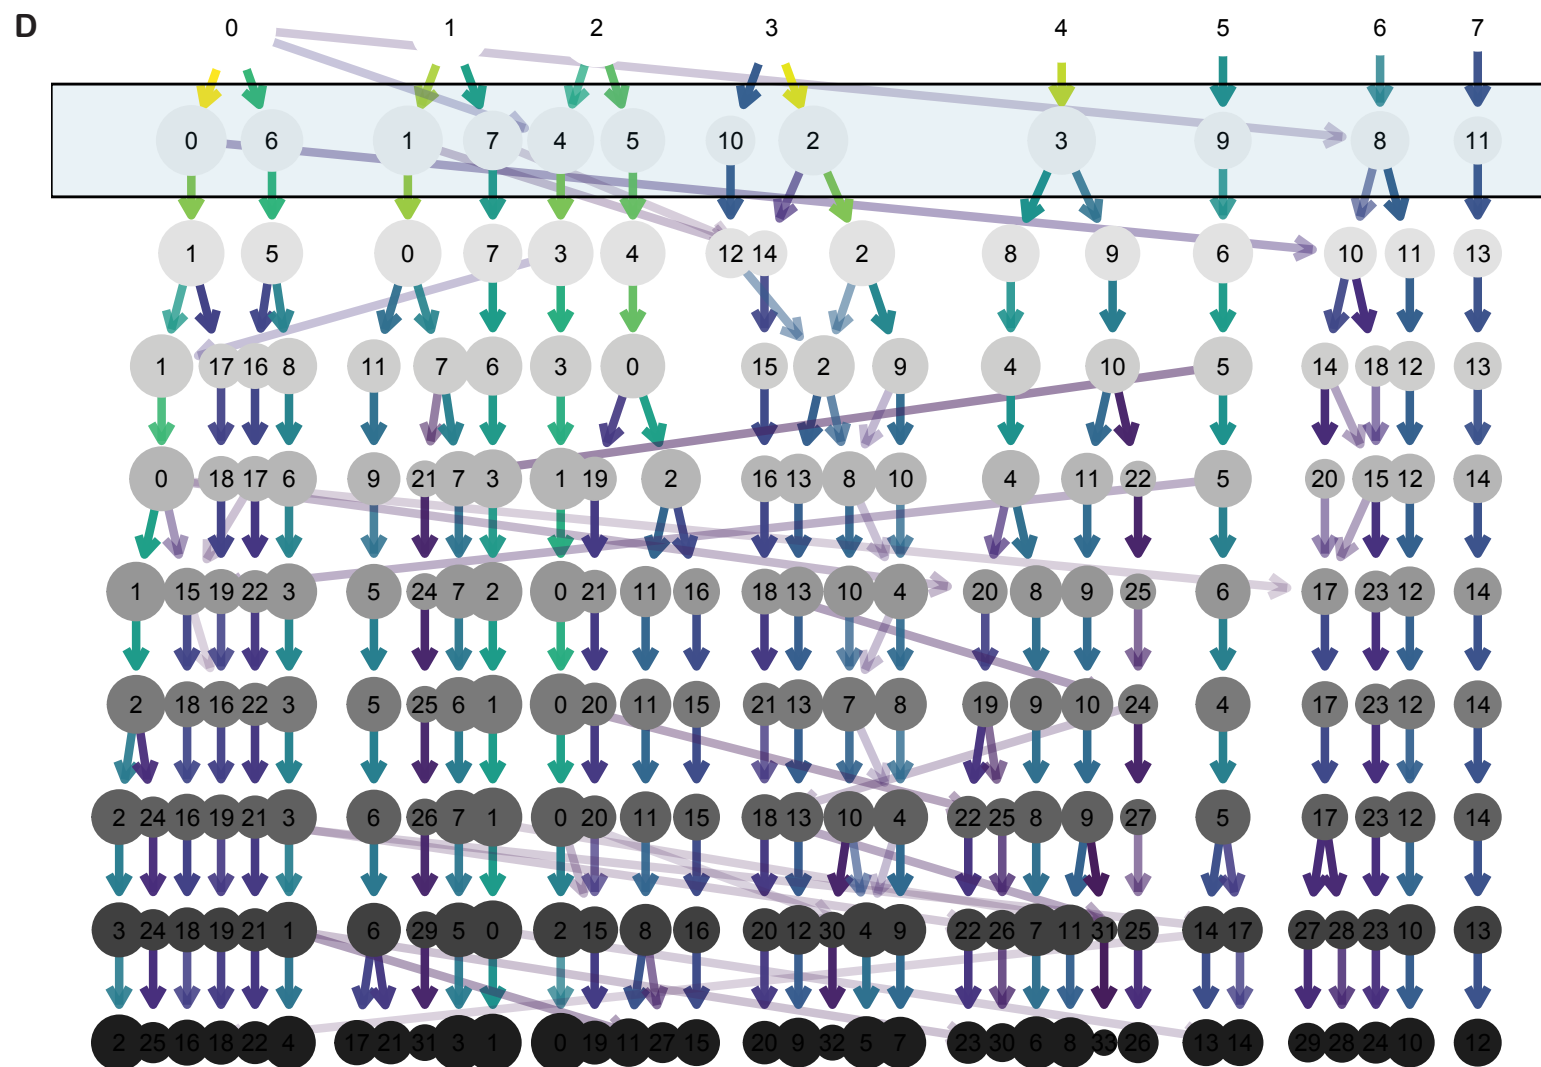

Supplement: Supplementary file 1 [file 05f541322cb0747e554a9ec6.pdf]

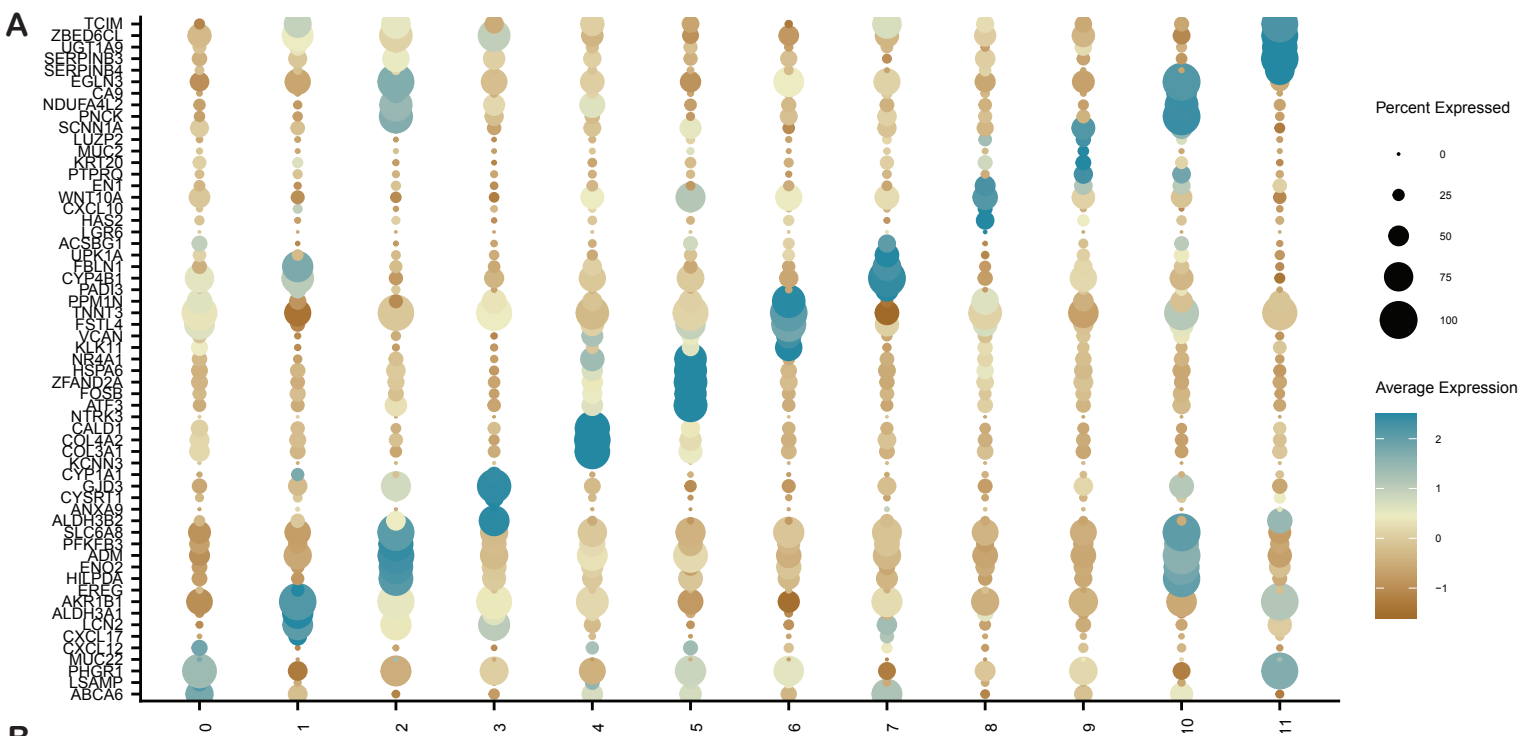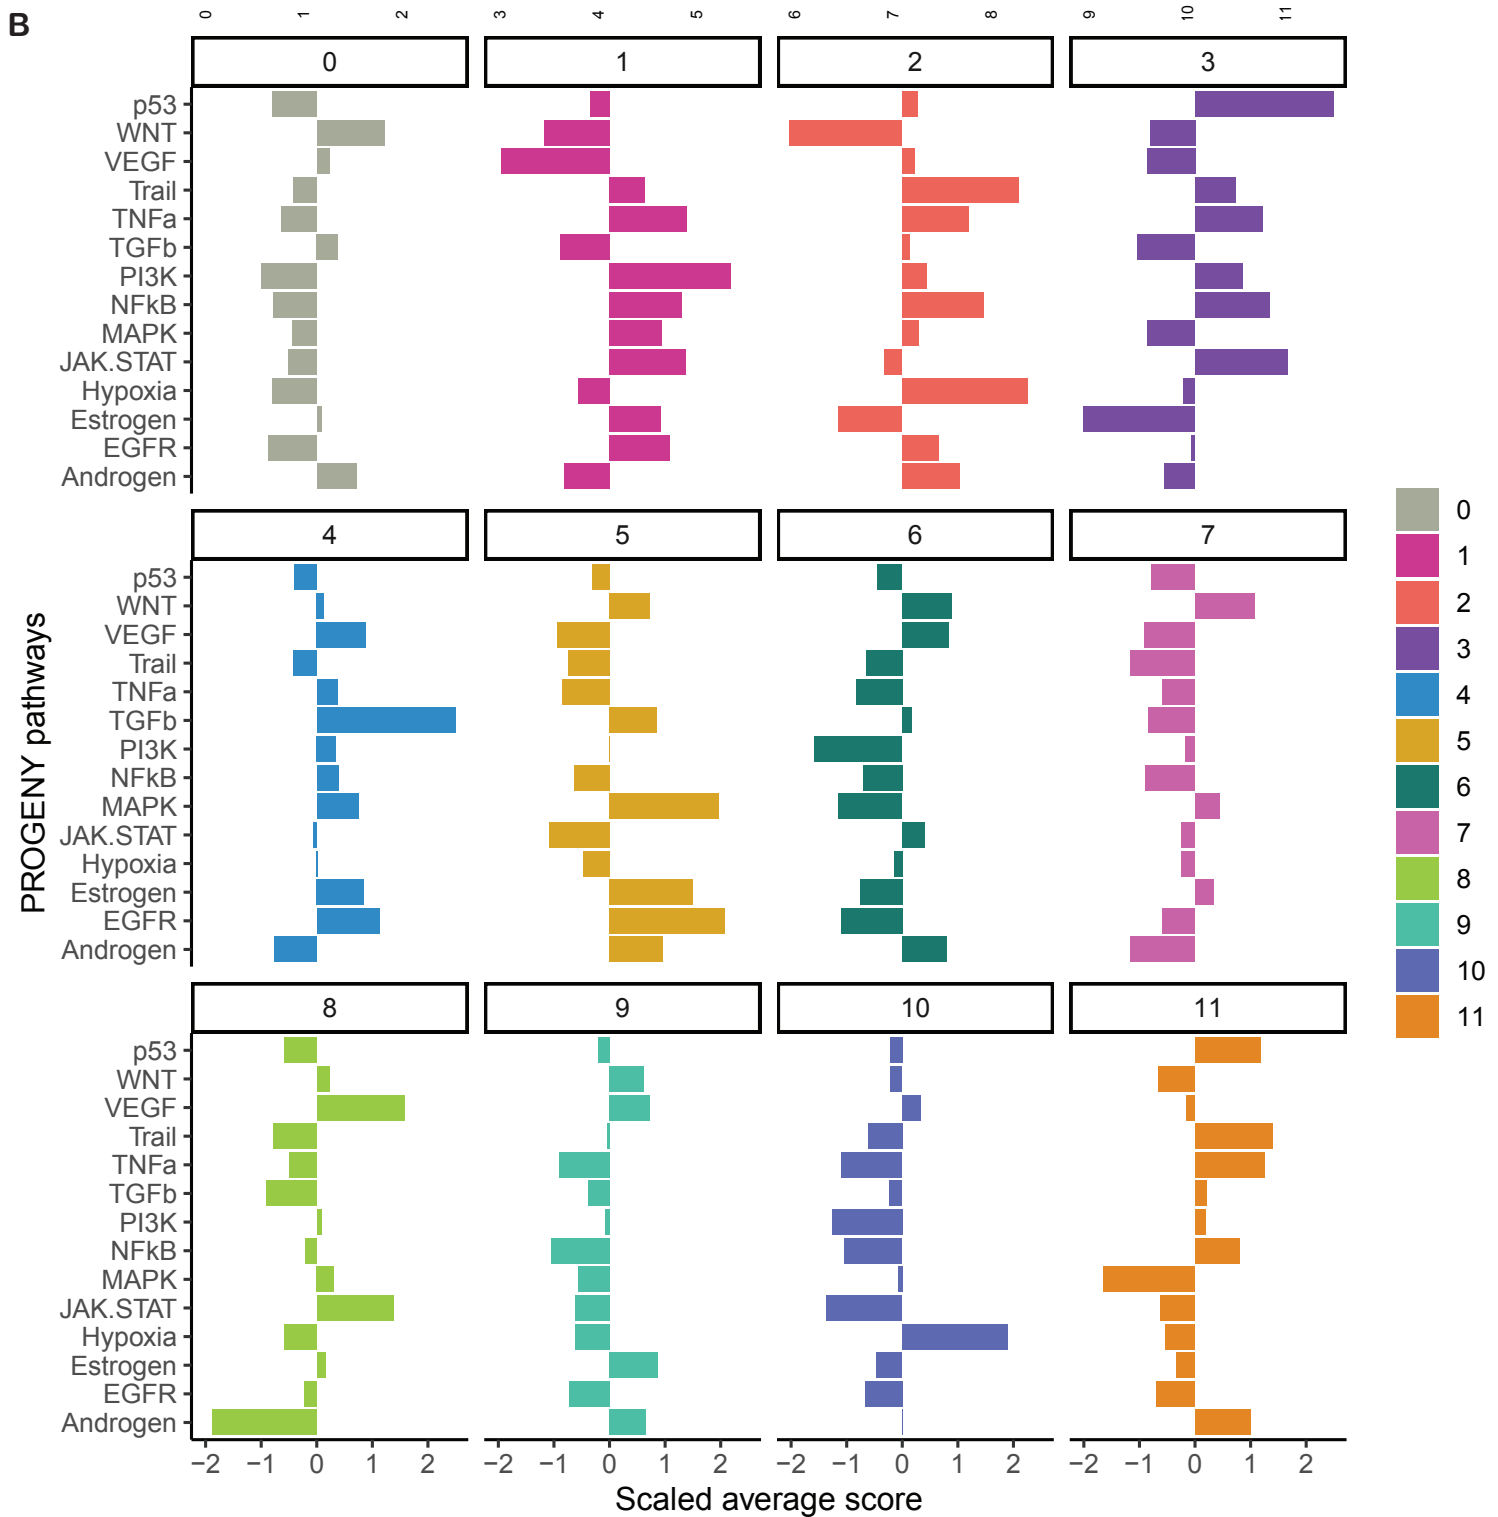

Supplement: Supplementary file 2 [file 43b8f22962d93d87b3b7cdcd.pdf]
